# Supplementary material for: Folic Acid-Modified Fluorescent-Magnetic Nanoparticles for Efficient Isolation and Identification of Circulating Tumor Cells in Ovarian Cancer
Source: MDPI journal article supplement (doi:10.3390/bios12030184), 2022-03-21
Supplement: s1 [file s1]

Supplementary Materials

# Folic Acid-Modified Fluorescent-Magnetic Nanoparticles for Efficient Isolation and Identification of Circulating Tumor Cells in Ovarian Cancer

Yue Pan <sup>1,2</sup>, Zhili Wang <sup>2</sup>, Jialing Ma <sup>1,2</sup>, Tongping Zhou <sup>1,2</sup>, Zeen Wu <sup>1,2</sup>, Pi Ding <sup>2</sup>, Na Sun <sup>2</sup>, Lifan Liu <sup>1</sup>, Renjun Pei <sup>2,\*</sup> and Weipei Zhu <sup>1,\*</sup>

<sup>1</sup> Department of Gynecology and Obstetrics, The Second Affiliated Hospital of Soochow University, Suzhou 215004, China; ypan2020@sinano.ac.cn (Y.P.); jlma2021@sinano.ac.cn (J.M.); tpzhou2021@sinano.ac.cn (T.Z.); ezwu2019@sinano.ac.cn (Z.W.); liulifan1981@126.com (L.L.)

<sup>2</sup> CAS Key Laboratory for Nano-Bio Interface, Suzhou Institute of Nano-Tech and Nano-Bionics, Chinese Academy of Sciences, Suzhou 215123, China; zlwang2013@sinano.ac.cn (Z.W.); pding2017@sinano.ac.cn (P.D.); nsun2013@sinano.ac.cn (N.S.)

\* Correspondence: rpei2011@sinano.ac.cn (R.P.); zw333xx@126.com (W.Z.); Tel.: +86-0512-62872776 (R.P.); +86-0512-67784769 (W.Z.)

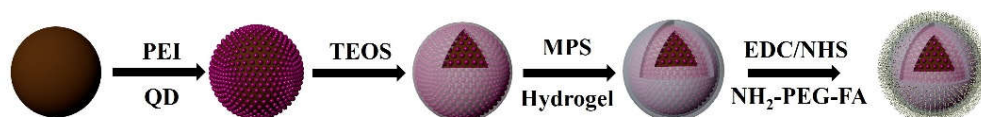

**Figure S1.** The interfacial modification of MNPs@FA for CTC isolation.

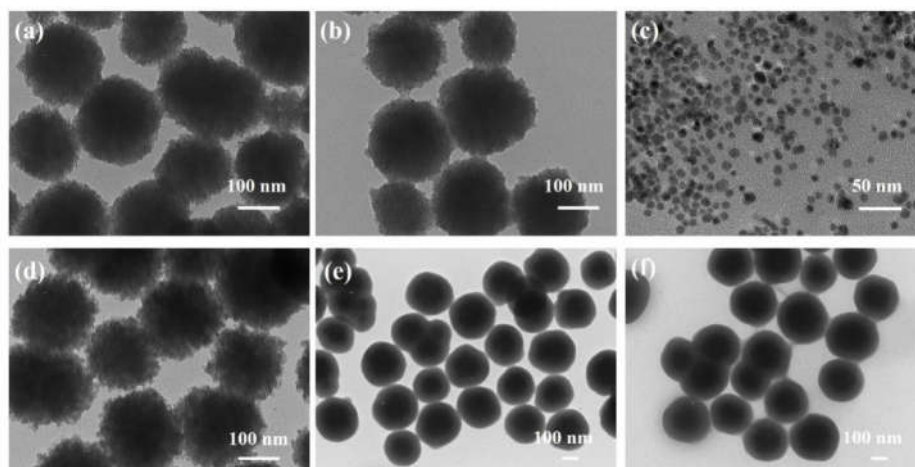

**Figure S2.** Transmission electron microscope (TEM) images of (a) Fe<sub>3</sub>O<sub>4</sub> nanoparticles (MNPs), (b) PEI-modified Fe<sub>3</sub>O<sub>4</sub> nanoparticles (MNPs@PEI), (c) CdSe/ZnS quantum dots (QDs), (d) QDs-modified Fe<sub>3</sub>O<sub>4</sub> nanoparticles (MNPs@QD), (e) silica-modified Fe<sub>3</sub>O<sub>4</sub> nanoparticles (MNPs@Si) and (f) hydrogel-coated MNPs@Si (MNPs@hydrogel).

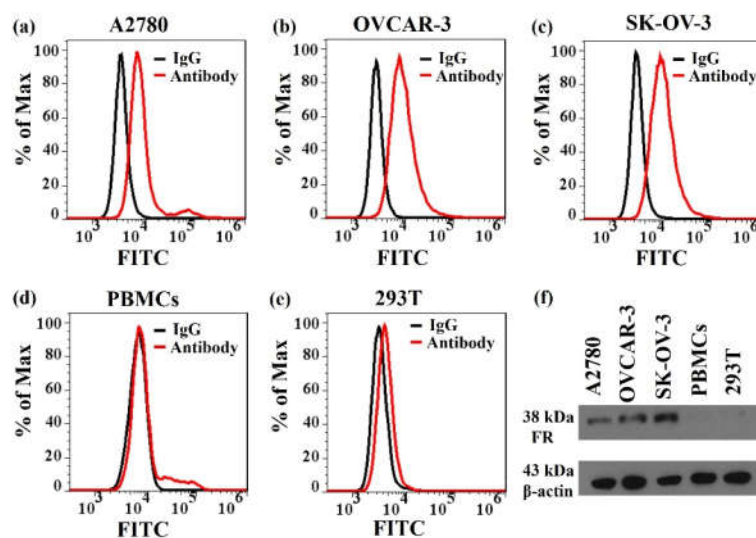

**Figure S3.** The expression levels of  $\alpha$ -FR protein in A2780, OVCAR-3, SK-OV-3, PBMCs, and HEK 293T cells analyzed by flow cytometry (a–e) and western blots (f). The cell-surface overexpression of  $\alpha$ -FR protein was confirmed by flow cytometry using anti- $\alpha$ -FR antibody, and the IgG was used as the control.

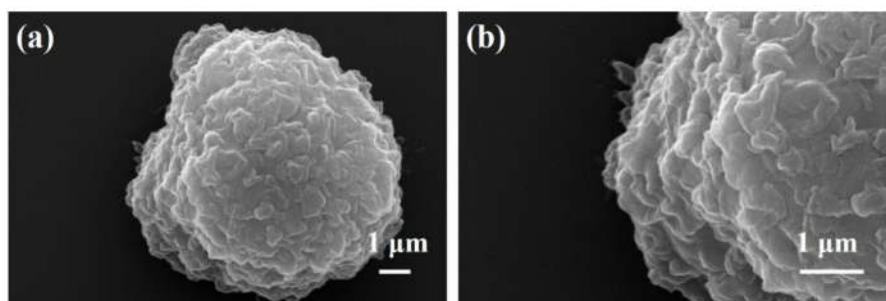

**Figure S4.** Scanning electron microscopy (SEM) images of an SK-OV-3 cell without MNPs@FA nanoparticles on the cell surface (a) and (b).

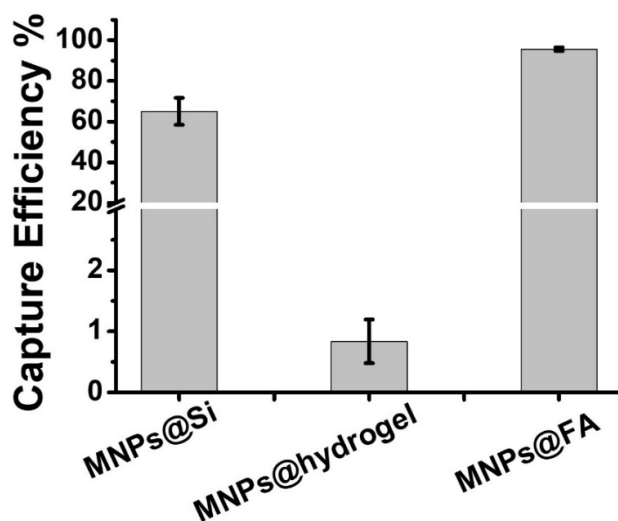

**Figure S5.** Comparison of capture efficiencies for SK-OV-3 cells by MNPs@Si, MNPs@hydrogel, and MNPs@FA (folic acid-modified MNPs@hydrogel).

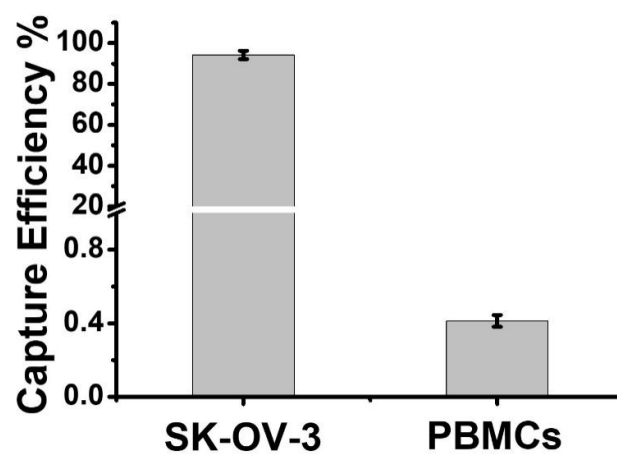

**Figure S6.** Capture performance of MNPs@FA for SK-OV-3 cells and PBMCs from the mixture sample at the ratio of 1:1.

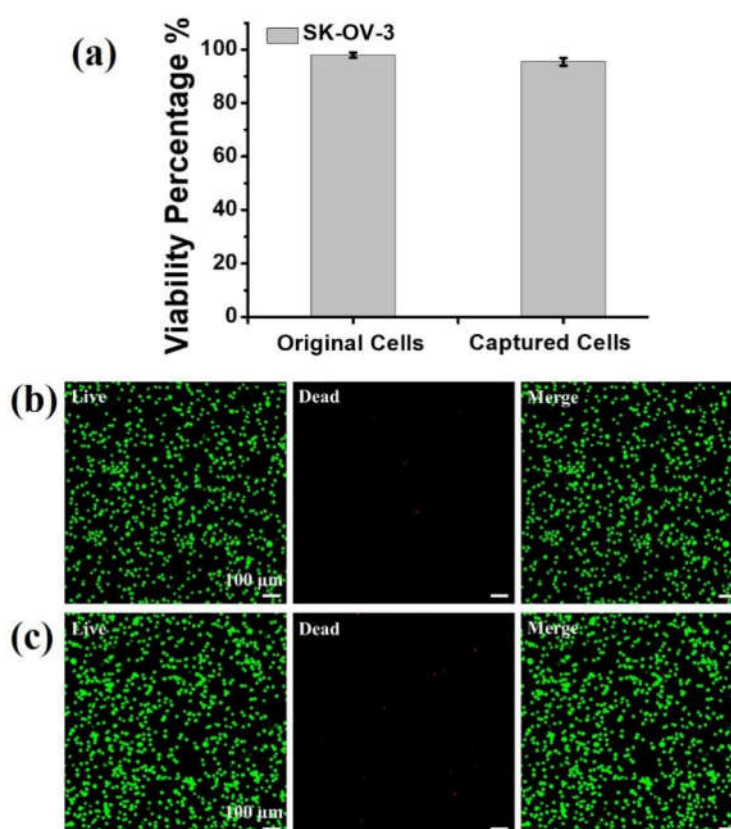

**Figure S7.** Cell viability of captured SK-OV-3 cells as well as original SK-OV-3 cells was evaluated by a live/dead staining. (a) Comparison of viability percentage of original and captured cells. Fluorescence imaging of cell viability of (b) original SK-OV-3 cells and (c) captured SK-OV-3 cells using live/dead staining (green: live; red: dead).

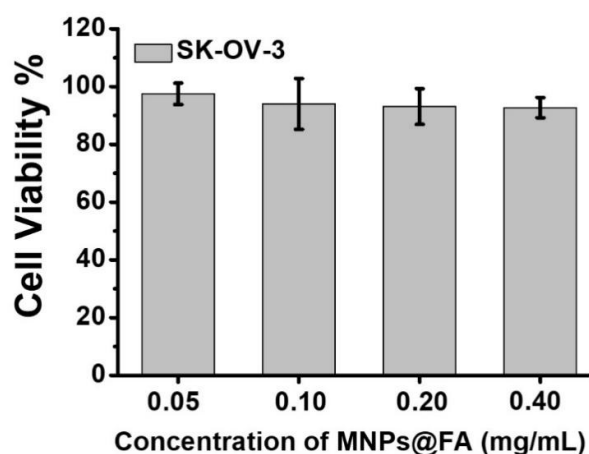

**Figure S8.** The viability of SK-OV-3 cells incubated with different concentrations of MNPs@FA for 24 h.

**Table S1.** Clinical information of ovarian cancer (OC) patients and healthy donors (HD) enrolled in this study.

| Diagnosis      | Patient no. | Age | Histology | FIGO | Therapy |               | Volume of blood (mL) | CTC counts |
|----------------|-------------|-----|-----------|------|---------|---------------|----------------------|------------|
|                |             |     |           |      | Surgery | Chemo-therapy |                      |            |
| Ovarian cancer | OC01        | 58  | EOC       | IIIA | N       | N             | 3                    | 2          |
|                | OC02        | 74  | EOC       | IIIC | Y       | Y             | 3                    | 12         |
|                | OC03        | 58  | EOC       | IIIA | Y       | N             | 3                    | 5          |
|                | OC04        | 51  | OSCST     | IV   | Y       | Y             | 3                    | 7          |
|                | OC05        | 53  | EOC       | III  | Y       | Y             | 3                    | 3          |
|                | OC06        | 58  | EOC       | IIIC | Y       | Y             | 3                    | 9          |
|                | OC07        | 76  | EOC       | IIIC | Y       | Y             | 3                    | 11         |
|                | OC08        | 41  | EOC       | IIIC | Y       | Y             | 3                    | 8          |
|                | OC09        | 68  | EOC       | IIIC | Y       | N             | 3                    | 4          |
|                | OC10        | 32  | EOC       | IIIC | Y       | Y             | 3                    | 7          |
| Healthy donors | HD01        | 26  | N/A       | N/A  | N/A     | N/A           | 3                    | 0          |
|                | HD02        | 31  | N/A       | N/A  | N/A     | N/A           | 3                    | 0          |
|                | HD03        | 47  | N/A       | N/A  | N/A     | N/A           | 3                    | 0          |
|                | HD04        | 63  | N/A       | N/A  | N/A     | N/A           | 3                    | 0          |
|                | HD05        | 52  | N/A       | N/A  | N/A     | N/A           | 3                    | 0          |
|                | HD06        | 60  | N/A       | N/A  | N/A     | N/A           | 3                    | 0          |
|                | HD07        | 49  | N/A       | N/A  | N/A     | N/A           | 3                    | 0          |
|                | HD08        | 51  | N/A       | N/A  | N/A     | N/A           | 3                    | 0          |
|                | HD09        | 48  | N/A       | N/A  | N/A     | N/A           | 3                    | 0          |
|                | HD10        | 58  | N/A       | N/A  | N/A     | N/A           | 3                    | 0          |
